# Supplementary material for: Endogenous Cardiac Troponin T Modulates Ca2+-Mediated Smooth Muscle Contraction
Source: PubMed Central journal article supplement — Sci Rep. 2012 Dec 14;2:979. doi: 10.1038/srep00979 (PMC3522072; doi:10.1038/srep00979), 2012-12-14
Supplement: srep00979-s1.pdf [file srep00979-s1.pdf]

## SUPPLEMENTAL INFORMATION

# Endogenous Cardiac Troponin T Modulates Ca<sup>2+</sup>- Mediated Smooth Muscle Contraction

### By

Shunichi Kajioaka<sup>#1</sup>, Fumi Takahashi-Yanaga<sup>#2</sup>, Nouval Shahab<sup>#1</sup>, Mitsuho Onimaru<sup>#3</sup>,  
Miho Matsuda<sup>#5</sup>, Ryosuke Takahashi<sup>#1</sup>, Haruhiko Asano<sup>#6</sup>, Hiromitsu Morita<sup>#6</sup>, Sachio  
Morimoto<sup>#2</sup>, Yoshikazu Yonemitsu<sup>#4</sup>, Maya Hayashi<sup>#1</sup>, Narihito Seki<sup>#1</sup>, Toshiyuki  
Sasaguri<sup>#2</sup>, Masato Hirata<sup>#5</sup>, Shinsuke Nakayama<sup>#8</sup>, Seiji Naito<sup>#1</sup>

### From

<sup>#1</sup>Department of Urology, <sup>#2</sup>Department of Clinical Pharmacology and <sup>#3</sup>Department of  
Pathology, <sup>#4</sup>Operating Unit for Clinical Trials of Gene Therapy, Graduate School of  
Medical Sciences, and <sup>#5</sup>Laboratory of Molecular & Cellular Biochemistry, Faculty of  
Dental Science, Kyushu University and <sup>#6</sup>Special Patient Oral Care Unit, Kyushu  
University Hospital Fukuoka 812-8582, Japan

<sup>#7</sup>Department of Biomedical Sciences, College of Life and Health Sciences, Chubu  
University, Kasugai Aichi, 487-8501, Japan

<sup>#8</sup> Department of Cell Physiology, Nagoya University Graduate School of Medicine,  
Nagoya 466-8550, Japan

**\*Correspondence:** Shinsuke Nakayama

Department of Cell Physiology, Nagoya University Graduate School of Medicine,  
65 Tsuruma-cho, Showa-ku, Nagoya 466-8550, JAPAN

Phone: +81 52 744 2045      Fax: +81 52 744 2048

E-mail: [h44673a@nucc.cc.nagoya-u.ac.jp](mailto:h44673a@nucc.cc.nagoya-u.ac.jp)

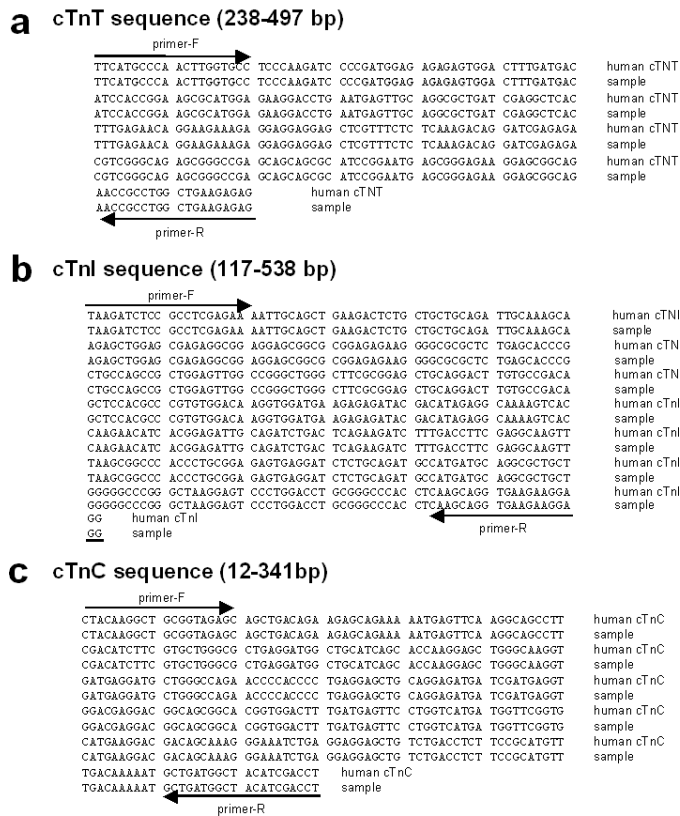

**Figure S1 | The partial DNA sequence of human cTnT, cTnI and cTnC.** PCR primers used are indicated by arrows. The sequences were exactly the same as known sequences of cDNAs of cTnT (238-497 bp), cTnI (117-538 bp) and cTnC (12-341bp) in human detrusor, respectively.

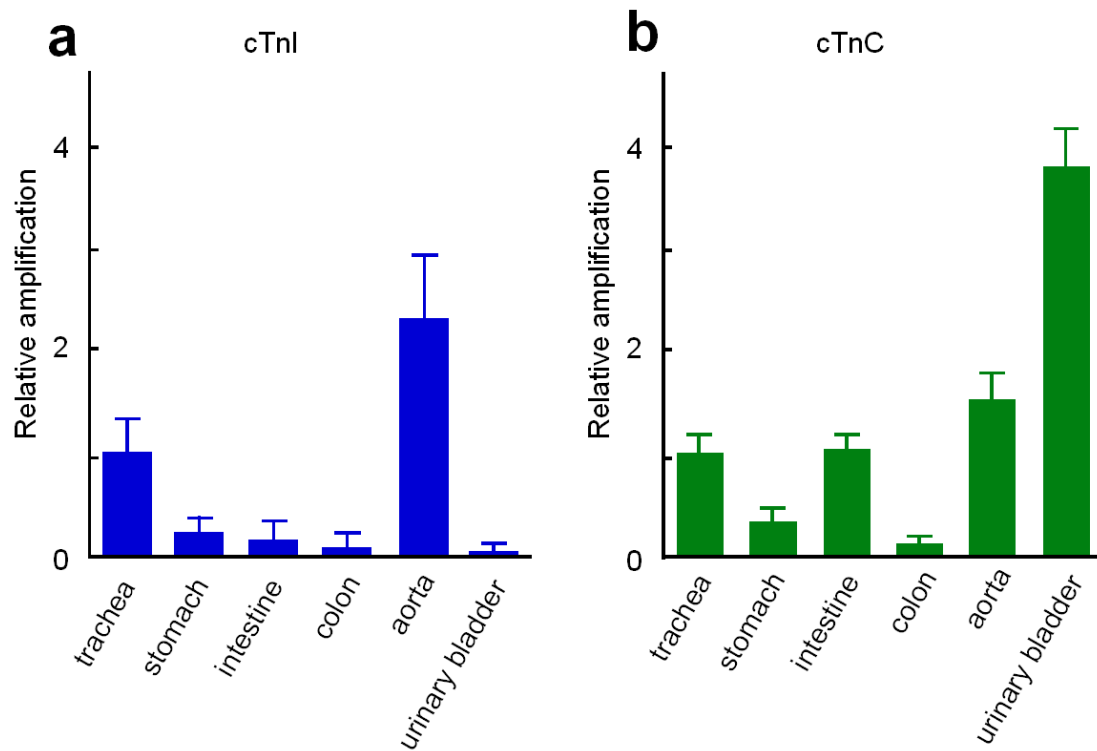

**Figure S2 | Real-time PCR quantification of cTnI (a) and cTnC (b) in tRNA of various human smooth muscle tissues.** All tRNA were purchased commercially. The mRNA expression of cTn in each smooth muscle tissue was compensated by that of GAPDH, and is plotted relative to that of trachea.

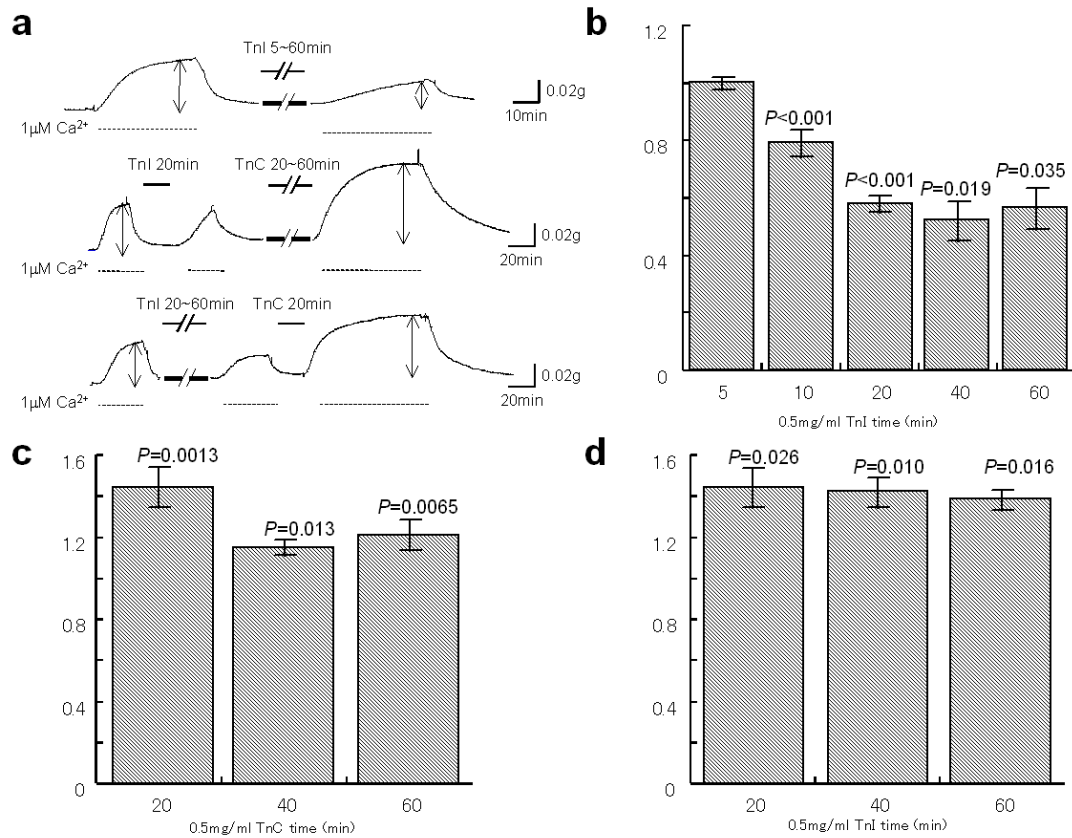

**Figure S3 | Time dependency of cTnI and cTnC effects on pig detrusor strip.** Pig detrusor strips were permeabilised with 20  $\mu\text{M}$   $\beta$ -escin for 30 min. **a**) Each trace indicates an experimental protocol performed to examine the effect of exposure time to cTnI and/or cTnC. **b-d**) Changes in force development are summarized ( $n=8-12$ ). Each column represents the mean  $\pm$  S.E. measured at each condition indicated by arrows when the amplitude of the contraction obtained at 1  $\mu\text{M}$   $\text{Ca}^{2+}$  was normalized as 1.0. The  $P$  value of each column was expressed when there was a significant difference ( $P < 0.05$ ) in comparison with that induced by 1  $\mu\text{M}$   $\text{Ca}^{2+}$ .

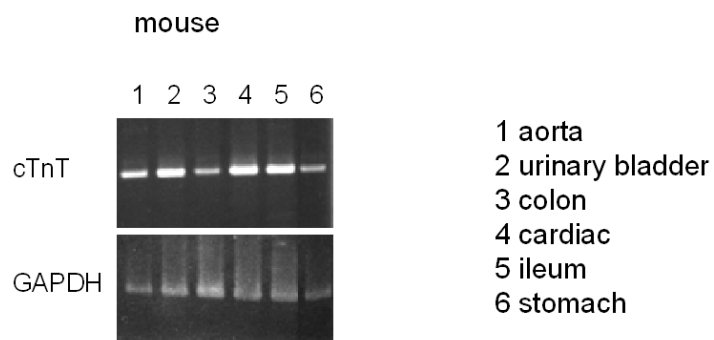

**Figure S4 | RT-PCR detection of cTnT in murine smooth muscle.** tRNA were extracted from the several tissues of mice. In urinary bladder, colon, ileum and stomach, the mucous was removed carefully.

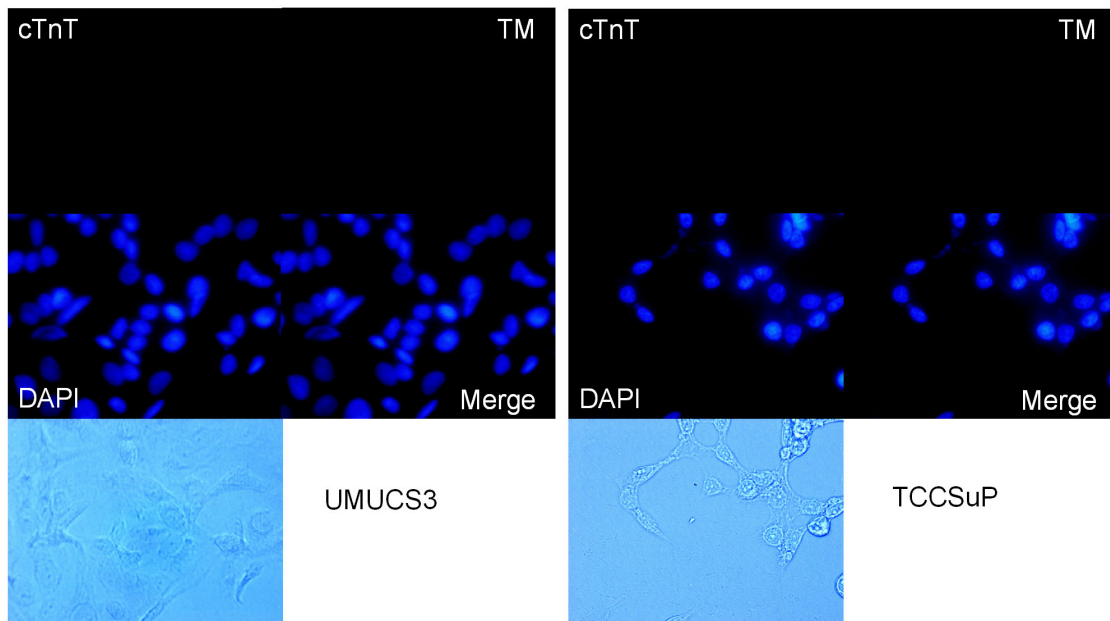

**Figure S5 | Negative controls.** Neither cTnT nor tropomyosin was detected in UMUCS3 and TCCSuP human urinary bladder carcinoma cells. Micrographs of cellular nuclei (blue: DAPI), and transmission are also shown.

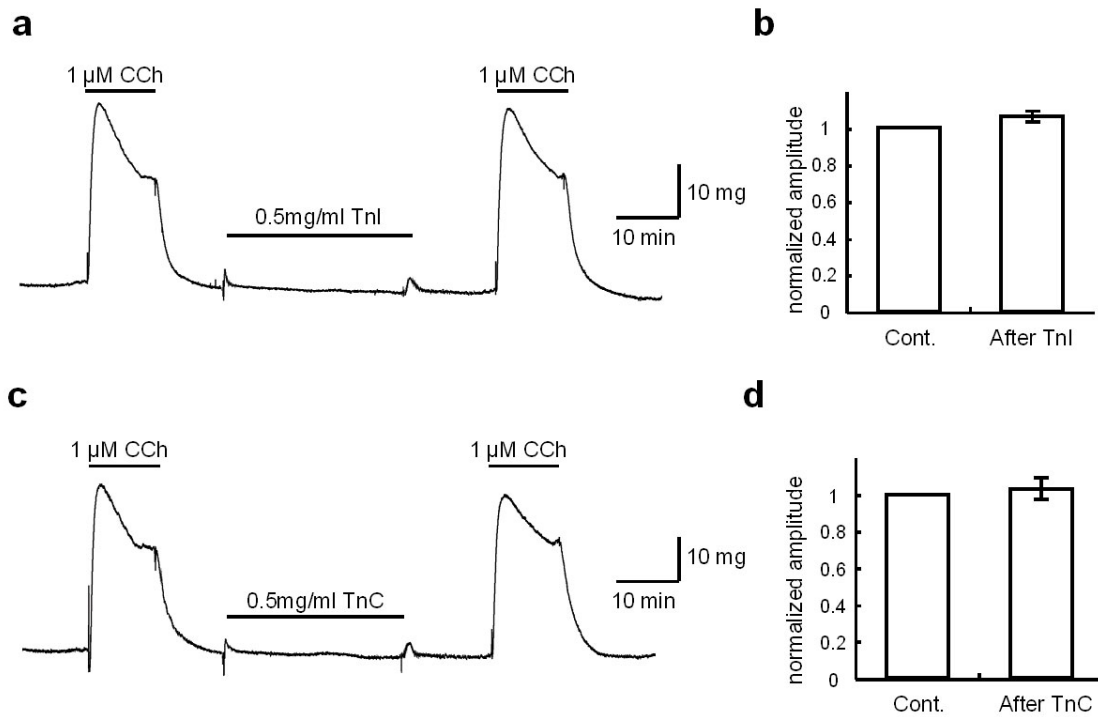

**Figure S6 | Lack of effects of cTnI and cTnC in intact detrusor strips from human.**

Either cTnI or cTnC were applied between CCh-induced contractions (**a, c**). The peak amplitude of contraction did not change after applications of cTnI and cTnC ( $P > 0.05$ ,  $n=6$ ) (**b, d**).
